# Supplementary material for: Magnetic Fe3O4-encapsulated VAN@MIL-101(Fe) with mixed-valence sites and mesoporous structures as efficient bifunctional water splitting photocatalysts
Source: Royal Society of Chemistry journal article supplement (doi:10.1039/d0nr02230f), 2020-01-01
Supplement: d0nr02230f1.pdf [file d0nr02230f1.pdf]

## Supporting Information

### **The magnetic Fe<sub>3</sub>O<sub>4</sub> encapsulated VAN@MIL-101(Fe) with mixed-valence sites and mesoporous as efficient bifunctional water splitting photocatalyst**

Yuan Guo,<sup>a</sup> Chao Feng,<sup>a</sup> Shanshan Qiao,<sup>a</sup> Shixin Wang,<sup>a</sup> Tingxiang Chen,<sup>a</sup> Li Zhang,<sup>a</sup> Yansong Zhao,<sup>b</sup> Jide

Wang<sup>\*a</sup>

*<sup>a</sup>Key Laboratory of Oil & Gas Fine Chemicals Ministry of Education & Xinjiang Uyghur Autonomous  
Region, Xinjiang University, Urumqi 830046, Xinjiang, China*

*<sup>b</sup>Department of Safety, Chemistry and Biomedical Laboratory Sciences, Faculty of Engineering and Science,  
Western Norway University of Applied Sciences, Inndalsveien28,5063 Bergen, Norway*

\* Corresponding author. E-mail: awangjd@sina.cn

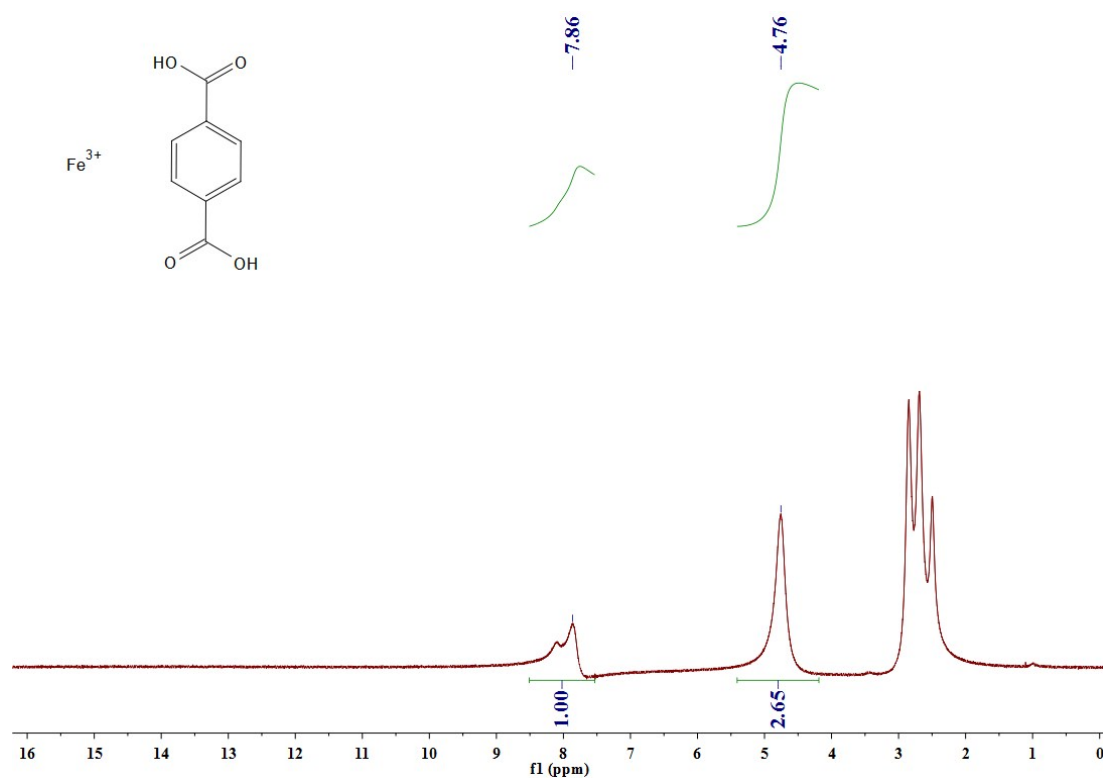

**Fig. S1**  $^1\text{H-NMR}$  spectra analysis of the dissolved MIL-101-Fe. ( $^1\text{H NMR}$  (400 MHz, DMSO)  $\delta$  7.86 (s, 1H), 4.76 (s, 3H)).

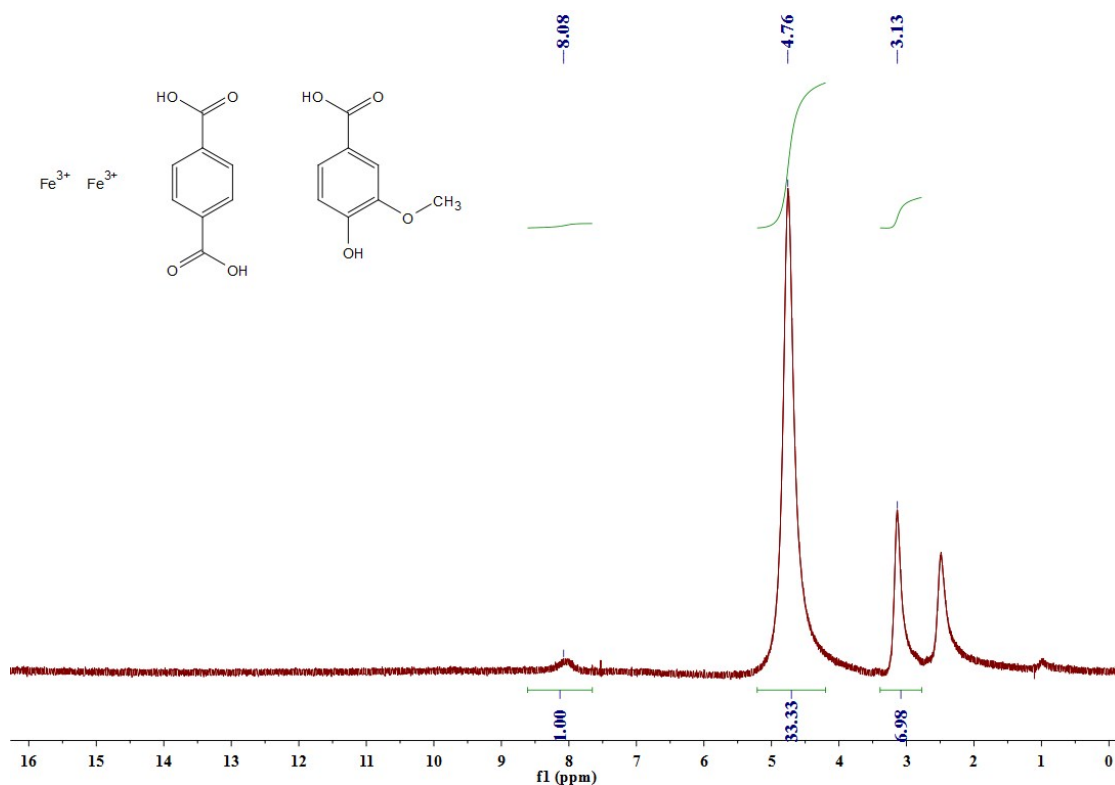

**Fig. S2**  $^1\text{H-NMR}$  spectra analysis of the dissolved VAN@MIL-101(Fe). ( $^1\text{H NMR}$  (400 MHz, DMSO)  $\delta$  8.08 (s, 1H), 4.76 (s, 33H), 3.13 (s, 7H)).

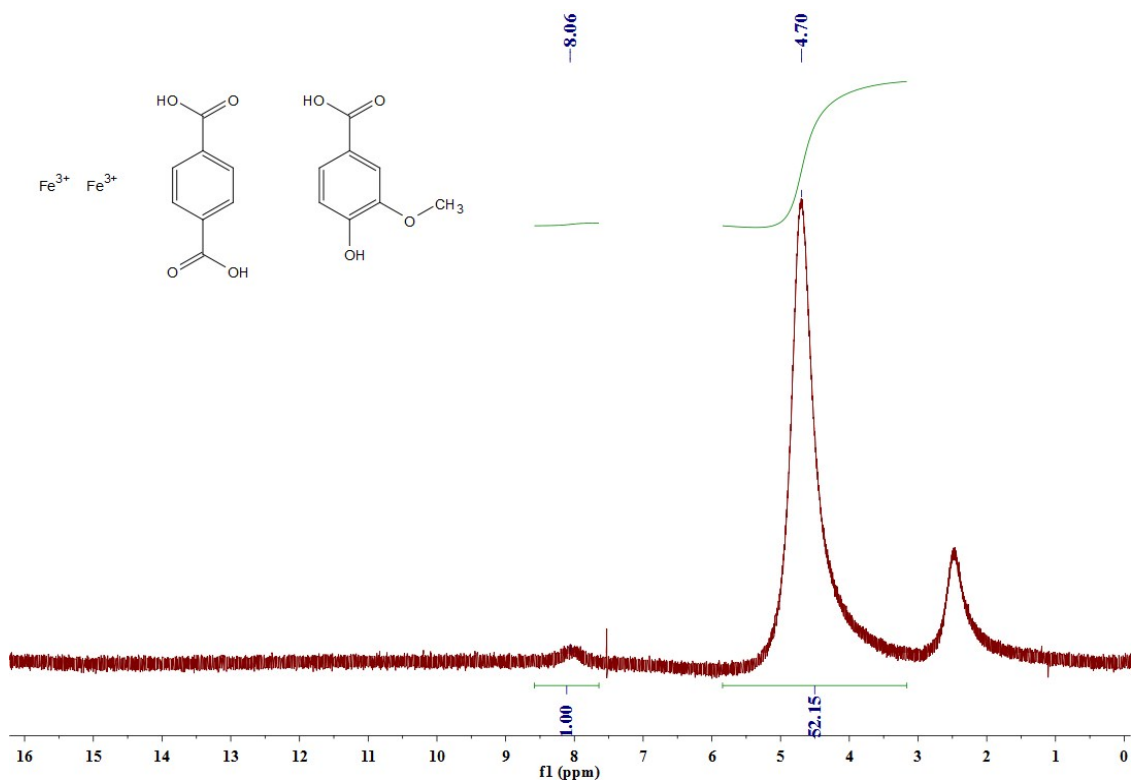

**Fig. S3**  $^1\text{H}$ -NMR spectra analysis of the dissolved  $\text{Fe}_3\text{O}_4/\text{VAN@MIL-101}(\text{Fe})$ . ( $^1\text{H}$  NMR (400 MHz, DMSO)  $\delta$  8.06 (s, 1H), 4.70 (s, 52H)).

**Table S1.** BET surface areas and pore features of hierarchical porous MIL-101(Fe), VAN@MIL-101(Fe) and  $\text{Fe}_3\text{O}_4/\text{VAN@MIL-101}(\text{Fe})$ .

| Sample                                                | $S_{\text{BET}}^{\text{a}}$<br>( $\text{m}^2/\text{g}$ ) | Pore volumes ( $\text{cm}^3/\text{g}$ ) |                               |                              |
|-------------------------------------------------------|----------------------------------------------------------|-----------------------------------------|-------------------------------|------------------------------|
|                                                       |                                                          | $V_{\text{total}}^{\text{b}}$           | $V_{\text{micro}}^{\text{c}}$ | $V_{\text{meso}}^{\text{d}}$ |
| MIL-101(Fe)                                           | 1613                                                     | 1.370                                   | 0.535                         | 0.584                        |
| VAN@MIL-101(Fe)                                       | 2389                                                     | 1.576                                   | 0.422                         | 0.959                        |
| $\text{Fe}_3\text{O}_4/\text{VAN@MIL-101}(\text{Fe})$ | 869                                                      | 0.802                                   | 0.216                         | 0.593                        |

<sup>a</sup> **SBET**: Brunauer–Emmett–Teller (BET) surface area. <sup>b</sup> **Vtotal**: Total pore volume calculated from the nitrogen adsorption data at  $P/P_0 = 0.998$ . <sup>c</sup> **Vmicro**: Micropore volume obtained by the t-plot method. <sup>d</sup> **Vmeso**: Mesopore volume calculated by the Barrett–Joyner–Halenda (BJH) adsorption method.

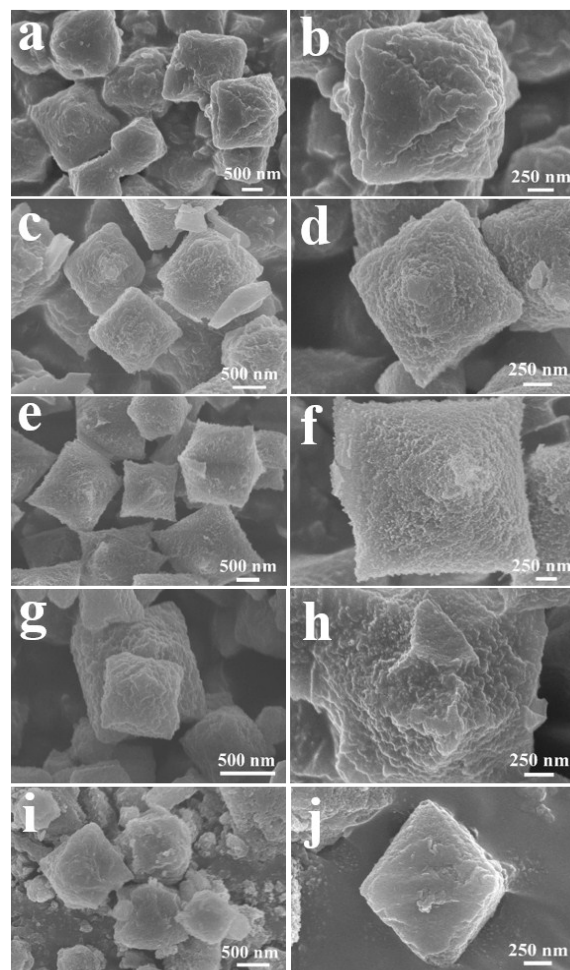

**Fig. S4** SEM images of the MIL-101(Fe) regulated by vanillin obtained in DMF at 110 °C for 20h, and the MIL-10(Fe) regulated by vanillin samples prepared with different molar ratios of H<sub>2</sub>BDC and vanillin. a.b: n(H<sub>2</sub>BDC):n(vanillin)=1:1; c.d: 1:5; e.f: 1:7; g.h: 1:8; i.j: 1:10.

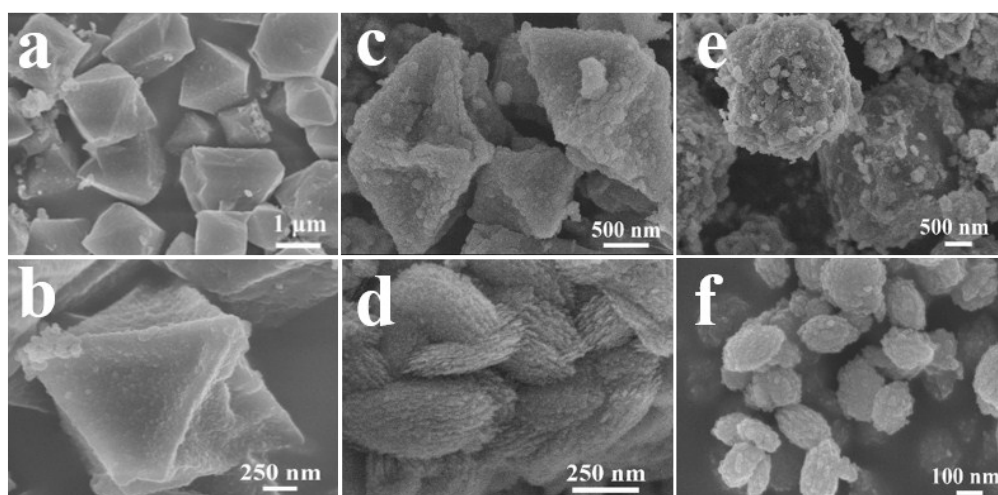

**Fig. S5** SEM images of the MIL-101(Fe) regulated by vanillin obtained in DMF at 110 °C for 20 h, and the MIL-101(Fe) regulated by vanillin samples prepared with different molar ratios of FeCl<sub>3</sub>·6H<sub>2</sub>O and H<sub>2</sub>BDC. a.b:n(FeCl<sub>3</sub>·6H<sub>2</sub>O):n(H<sub>2</sub>BDC)=1:2; c,d: 7:1; e: 10:1; f: 20:1.

**Table S2.** Reference experiments about photocatalytic oxidation of water for catalysts (MIL-101(Fe), VAN@MIL-101(Fe))

and Fe<sub>3</sub>O<sub>4</sub>/ VAN@MIL-101(Fe)) under different catalytic conditions (1 mg catalyst, 1.0 × 10<sup>-3</sup> M [Ru(bpy)<sub>3</sub>](ClO<sub>4</sub>)<sub>2</sub>, 20.0 × 10<sup>-3</sup> M Na<sub>2</sub>S<sub>2</sub>O<sub>8</sub>, 80 × 10<sup>-3</sup> M sodium borate buffer (initial pH=10.0)).

| Catalyst                                         | Electron acceptor                             | Photosensitizer                       | Irradiation | OER activity |
|--------------------------------------------------|-----------------------------------------------|---------------------------------------|-------------|--------------|
| -                                                | Na <sub>2</sub> S <sub>2</sub> O <sub>8</sub> | [Ru(bpy) <sub>3</sub> ] <sup>2+</sup> | Yes         | No           |
| MIL-101(Fe)                                      | -                                             | [Ru(bpy) <sub>3</sub> ] <sup>2+</sup> | Yes         | No           |
| VAN@MIL-101(Fe)                                  | -                                             | [Ru(bpy) <sub>3</sub> ] <sup>2+</sup> | Yes         | No           |
| Fe <sub>3</sub> O <sub>4</sub> / VAN@MIL-101(Fe) | -                                             | [Ru(bpy) <sub>3</sub> ] <sup>2+</sup> | Yes         | No           |
| MIL-101(Fe)                                      | Na <sub>2</sub> S <sub>2</sub> O <sub>8</sub> | -                                     | Yes         | No           |
| VAN@MIL-101(Fe)                                  | Na <sub>2</sub> S <sub>2</sub> O <sub>8</sub> | -                                     | Yes         | No           |
| Fe <sub>3</sub> O <sub>4</sub> / VAN@MIL-101(Fe) | Na <sub>2</sub> S <sub>2</sub> O <sub>8</sub> | -                                     | Yes         | No           |
| MIL-101(Fe)                                      | Na <sub>2</sub> S <sub>2</sub> O <sub>8</sub> | [Ru(bpy) <sub>3</sub> ] <sup>2+</sup> | No          | No           |
| VAN@MIL-101(Fe)                                  | Na <sub>2</sub> S <sub>2</sub> O <sub>8</sub> | [Ru(bpy) <sub>3</sub> ] <sup>2+</sup> | No          | No           |
| Fe <sub>3</sub> O <sub>4</sub> / VAN@MIL-101(Fe) | Na <sub>2</sub> S <sub>2</sub> O <sub>8</sub> | [Ru(bpy) <sub>3</sub> ] <sup>2+</sup> | No          | No           |
| MIL-101(Fe)                                      | Na <sub>2</sub> S <sub>2</sub> O <sub>8</sub> | [Ru(bpy) <sub>3</sub> ] <sup>2+</sup> | Yes         | Yes          |
| VAN@MIL-101(Fe)                                  | Na <sub>2</sub> S <sub>2</sub> O <sub>8</sub> | [Ru(bpy) <sub>3</sub> ] <sup>2+</sup> | Yes         | Yes          |
| Fe <sub>3</sub> O <sub>4</sub> / VAN@MIL-101(Fe) | Na <sub>2</sub> S <sub>2</sub> O <sub>8</sub> | [Ru(bpy) <sub>3</sub> ] <sup>2+</sup> | Yes         | Yes          |

**Table S3.** Reference experiments about photocatalytic reduction of water for catalysts (MIL-101(Fe), VAN@MIL-101(Fe) and Fe<sub>3</sub>O<sub>4</sub>/ VAN@MIL-101(Fe)) under different catalytic conditions (5mg catalysts, 1 mL triethanolamine (TEOA) and 9 mL H<sub>2</sub>O, total reaction volume 10 mL).

| Catalyst                                         | Reaction system               | Irradiation | HER activity |
|--------------------------------------------------|-------------------------------|-------------|--------------|
| -                                                | 10% TEOA+90% H <sub>2</sub> O | Yes         | No           |
| MIL-101(Fe)                                      | 100% H <sub>2</sub> O         | Yes         | No           |
| VAN@MIL-101(Fe)                                  | 100% H <sub>2</sub> O         | Yes         | No           |
| Fe <sub>3</sub> O <sub>4</sub> / VAN@MIL-101(Fe) | 100% H <sub>2</sub> O         | Yes         | No           |
| MIL-101(Fe)                                      | 10% TEOA+90% H <sub>2</sub> O | No          | No           |
| VAN@MIL-101(Fe)                                  | 10% TEOA+90% H <sub>2</sub> O | No          | No           |
| Fe <sub>3</sub> O <sub>4</sub> / VAN@MIL-101(Fe) | 10% TEOA+90% H <sub>2</sub> O | No          | No           |
| MIL-101(Fe)                                      | 10% TEOA+90% H <sub>2</sub> O | Yes         | No           |
| VAN@MIL-101(Fe)                                  | 10% TEOA+90% H <sub>2</sub> O | Yes         | Yes          |
| Fe <sub>3</sub> O <sub>4</sub> / VAN@MIL-101(Fe) | 10% TEOA+90% H <sub>2</sub> O | Yes         | Yes          |

**Table S4.** Comparison of the catalytic performance of photocatalytic oxidation of water about different catalysts of other works.

| Catalyst                                        | Reaction condition                                                                                                                                                                                                                                                             | Evolved oxygen       | Ref.      |
|-------------------------------------------------|--------------------------------------------------------------------------------------------------------------------------------------------------------------------------------------------------------------------------------------------------------------------------------|----------------------|-----------|
| Fe <sub>3</sub> O <sub>4</sub> /VAN@MIL-101(Fe) | 300 W Xe lamp ( $\lambda \geq 420$ nm); 1 mg catalyst; $1.0 \times 10^{-3}$ M [Ru(bpy) <sub>3</sub> ] (ClO <sub>4</sub> ) <sub>2</sub> , $20.0 \times 10^{-3}$ M Na <sub>2</sub> S <sub>2</sub> O <sub>8</sub> , $80 \times 10^{-3}$ M sodium borate buffer (initial pH=10.0). | 360000 $\mu$ mol/g/h | This work |
| VAN@MIL-101(Fe)                                 | 300 W Xe lamp ( $\lambda \geq 420$ nm); 1 mg catalyst; $1.0 \times 10^{-3}$ M [Ru(bpy) <sub>3</sub> ] (ClO <sub>4</sub> ) <sub>2</sub> , $20.0 \times 10^{-3}$ M Na <sub>2</sub> S <sub>2</sub> O <sub>8</sub> , $80 \times 10^{-3}$ M sodium borate buffer (initial pH=10.0). | 269400 $\mu$ mol/g/h | This work |
| MIL-101(Fe)-NH <sub>2</sub>                     | 300 W Xe lamp ( $\lambda \geq 420$ nm); 1 mg catalyst; $1.0 \times 10^{-3}$ M [Ru(bpy) <sub>3</sub> ] (ClO <sub>4</sub> ) <sub>2</sub> , $20.0 \times 10^{-3}$ M Na <sub>2</sub> S <sub>2</sub> O <sub>8</sub> , $80 \times 10^{-3}$ M sodium borate buffer (initial pH=10.0). | 123660 $\mu$ mol/g/h | [1]       |
| MIL-101(Fe)                                     | 300 W Xe lamp ( $\lambda \geq 420$ nm); 1 mg catalyst; $1.0 \times 10^{-3}$ M [Ru(bpy) <sub>3</sub> ] (ClO <sub>4</sub> ) <sub>2</sub> , $20.0 \times 10^{-3}$ M Na <sub>2</sub> S <sub>2</sub> O <sub>8</sub> , $80 \times 10^{-3}$ M sodium borate buffer (initial pH=10.0). | 219000 $\mu$ mol/g/h | [1]       |
| Cu-ZIF-400                                      | Catalyst (0.20 g/L); NaPi buffer solution (pH 7.0, 10.0 mL); Na <sub>2</sub> S <sub>2</sub> O <sub>8</sub> (5.0 mM); [Ru(bpy) <sub>3</sub> ]Cl <sub>2</sub> (1.0 mM); LED lamp, $\lambda = 420$ nm                                                                             | 53.4 $\mu$ mol/g/h   | [2]       |
| MIL-100(Fe)                                     | Catalyst (15 mg); acetate buffer (100 mM, pH = 4) or deionized water (pH = 6.8); NaIO <sub>3</sub> (5.0 mM); LED lamp, $\lambda = 420$ nm                                                                                                                                      | 6.06 $\mu$ mol/g/h   | [3]       |
| MIL-100(Fe)@BiVO <sub>4</sub>                   | Catalyst (15 mg); acetate buffer (100 mM, pH = 4) or deionized water (pH = 6.8); NaIO <sub>3</sub> (5.0 mM); LED lamp, $\lambda = 420$ nm                                                                                                                                      | 333.3 $\mu$ mol/g/h  | [3]       |

|                                                        |                                                                                                                                                                                                                |                            |      |
|--------------------------------------------------------|----------------------------------------------------------------------------------------------------------------------------------------------------------------------------------------------------------------|----------------------------|------|
| Red TiO <sub>2</sub> - RuO <sub>2</sub><br>co-catalyst | 100 mg TiO <sub>2</sub> with RuO <sub>2</sub> modification was dispersed in 100 mL aqueous solution containing 0.85 g AgNO <sub>3</sub> ; The reaction temperature:10 °C; 300 W Xe lamp ( $\lambda = 420$ nm). | 81.6 $\mu\text{mol/g/h}$   | [4]  |
| Mo doped Bi <sub>2</sub> WO <sub>6</sub>               | 0.1 g of photocatalysts; 0.1 M NaOH; 0.02 M Na <sub>2</sub> S <sub>2</sub> O <sub>8</sub> ; 100 mL water; 300 W Xeon lamp, $\lambda > 420$ nm                                                                  | 147.2 $\mu\text{mol/g/h}$  | [5]  |
| g-C <sub>3</sub> N <sub>4</sub> /BiVO <sub>4</sub>     | 0.02 g photocatalysts; 0.05 M AgNO <sub>3</sub> ; 12 mL water; 300 W Xeon lamp, $\lambda > 420$ nm                                                                                                             | 328 $\mu\text{mol/g/h}$    | [6]  |
| 0.5% FeOOH NSs/BiVO <sub>4</sub>                       | 0.1 g photocatalyst; 0.85 g of AgNO <sub>3</sub> ; 270 mL of water; 300 W Xe lamp ( $\lambda > 400$ nm).                                                                                                       | 1130.0 $\mu\text{mol/g/h}$ | [7]  |
| Pt@Cu <sub>2</sub> O/WO <sub>3</sub>                   | 0.300 g photocatalyst; 200 mL of 0.01 M aqueous AgNO <sub>3</sub> solution; 300 W Xe lamp without cut-off filter                                                                                               | 1238.6 $\mu\text{mol/g/h}$ | [8]  |
| Co@Co <sub>3</sub> O <sub>4</sub>                      | 5 mg photocatalysts; 80 mM Na <sub>2</sub> S <sub>2</sub> O <sub>8</sub> ; 10 mL 0.1 M NaOH (pH = 13); 20 mL water; 300 W, Xe lamp, $\lambda > 420$ nm                                                         | 2278 $\mu\text{mol/g/h}$   | [9]  |
| BiO <sub>2-x</sub> UTNSs                               | 20 mg photocatalysts; 2 mg methyl viologen; 80 mL water; 300 W Xe lamp, AM 1.5 G                                                                                                                               | 2715.4 $\mu\text{mol/g/h}$ | [10] |

**Table S5.** Comparison of the catalytic performance of photocatalytic reduction of water about different catalysts of other works.

| Catalyst                                        | Reaction condition                                                                                                    | Evolved hydrogen        | Ref.      |
|-------------------------------------------------|-----------------------------------------------------------------------------------------------------------------------|-------------------------|-----------|
| Fe <sub>3</sub> O <sub>4</sub> /VAN@MIL-101(Fe) | 300 W Xe lamp ( $\lambda \geq 420$ nm); 5 mg catalysts, 10% TEOA + 90% H <sub>2</sub> O, total reaction volume 10 mL. | 584 $\mu\text{mol/g/h}$ | This work |

|                                                                     |                                                                                                                                                                |                           |           |
|---------------------------------------------------------------------|----------------------------------------------------------------------------------------------------------------------------------------------------------------|---------------------------|-----------|
| VAN@MIL-101(Fe)                                                     | 300 W Xe lamp ( $\lambda \geq 420$ nm); 5 mg catalysts, 10% TEOA + 90% H <sub>2</sub> O, total reaction volume 10 mL.                                          | 480 $\mu\text{mol/g/h}$   | This work |
| NH <sub>2</sub> -MIL-125/TiO <sub>2</sub>                           | 50 mg catalysts, 60 mL Na <sub>2</sub> S <sub>9</sub> H <sub>2</sub> O (0.2 M) and Na <sub>2</sub> SO <sub>3</sub> (0.3 M); 300W Xe lamp ( $\lambda = 420$ nm) | 490 $\mu\text{mol/g/h}$   | [11]      |
| ZIF-8                                                               | Methanol (CH <sub>3</sub> OH) was used as a sacrificial electron donor; Xe lamp irradiation (AM 1.5 G, 100 mW cm <sup>-2</sup> ).                              | 0.01 $\mu\text{mol/g/h}$  | [12]      |
| MoS <sub>2</sub> @ZIF-8                                             | Methanol (CH <sub>3</sub> OH) was used as a sacrificial electron donor; Xe lamp irradiation (AM 1.5 G, 100 mW cm <sup>-2</sup> ).                              | 68.4 $\mu\text{mol/g/h}$  | [12]      |
| 15.0 wt%MOC-16/g-C <sub>3</sub> N <sub>4</sub>                      | 300 W Xe lamp ( $\lambda \geq 420$ nm); 10 mg catalysts, 2 mL TEOA + 18 mL H <sub>2</sub> O, total reaction volume 20 mL.                                      | 515 $\mu\text{mol/g/h}$   | [13]      |
| Cu <sub>2</sub> O/C <sub>3</sub> N <sub>4</sub>                     | 0.1 g photocatalysts; 180 mL triethanolamine (TEOA); 35 $\pm$ 5°C; 20 mL water; 300 W Xe lamp, $\lambda > 420$ nm                                              | 241.3 $\mu\text{mol/g/h}$ | [14]      |
| Cu/Cu <sub>2</sub> O@NC                                             | 2 mg of photocatalysts; 50 mL CH <sub>3</sub> OH (10%); 300 W Xeon lamp, $\lambda > 420$ nm                                                                    | 379.6 $\mu\text{mol/g/h}$ | [15]      |
| Au/TiO <sub>2</sub>                                                 | 20 mg photocatalysts; 80 mL water; 300 W Xe lamp, $\lambda > 420$ nm                                                                                           | 120 $\mu\text{mol/g/h}$   | [16]      |
| M-Doped La <sub>2</sub> Ti <sub>2</sub> O <sub>7</sub>              | 1 g photocatalysts; 500 mL water; High-pressure Hg lamp (Ace Glass Inc., 450 W)                                                                                | 400 $\mu\text{mol/g/h}$   | [17]      |
| Ti <sub>3</sub> C <sub>2</sub> T <sub>x</sub> /CdS                  | 0.300 g photocatalyst; 80 ml of 10 vol.% lactic acid; 300 W Xe lamp, $\lambda > 420$ nm                                                                        | 473 $\mu\text{mol/g/h}$   | [18]      |
| CdS/Cu <sub>7</sub> S <sub>4</sub> /g-C <sub>3</sub> N <sub>4</sub> | dispersed into 100 mL aqueous solution containing 0.35 M Na <sub>2</sub> S and 0.25 M Na <sub>2</sub> SO <sub>3</sub> ; 300 W Xe lamp, $\lambda > 420$ nm      | 357 $\mu\text{mol/g/h}$   | [19]      |



suspended in the 1000 ml reaction solution; methanol (20%); isopropyl alcohol (30%).

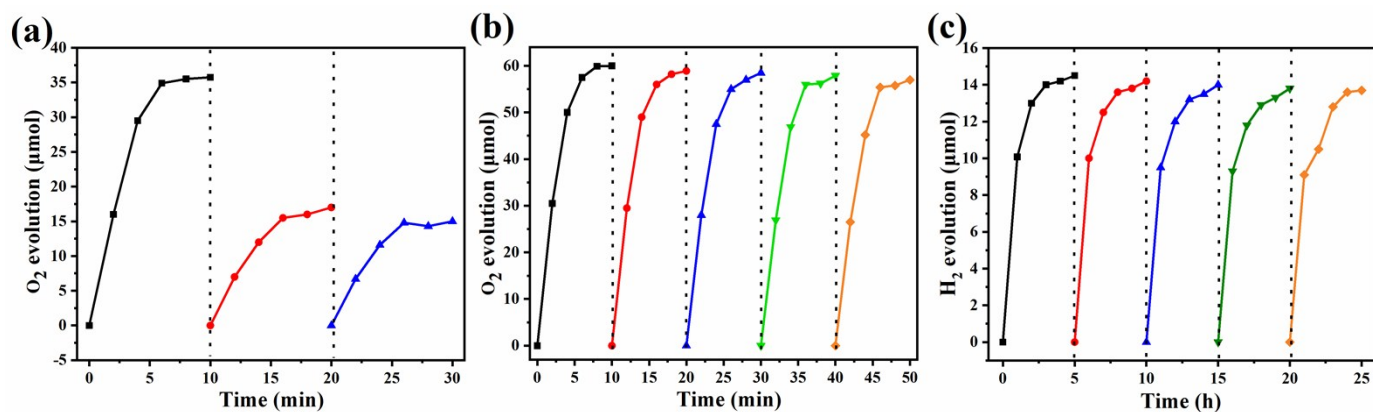

**Fig. S6** (a) Recycle study of MIL-101(Fe) in the light-driven water oxidation reaction; (c), (d) Recycle study of Fe<sub>3</sub>O<sub>4</sub>/VAN@MIL-101(Fe) in the light-driven water oxidation reaction and water reduction reaction, respectively, the reaction system was evacuated after each run.

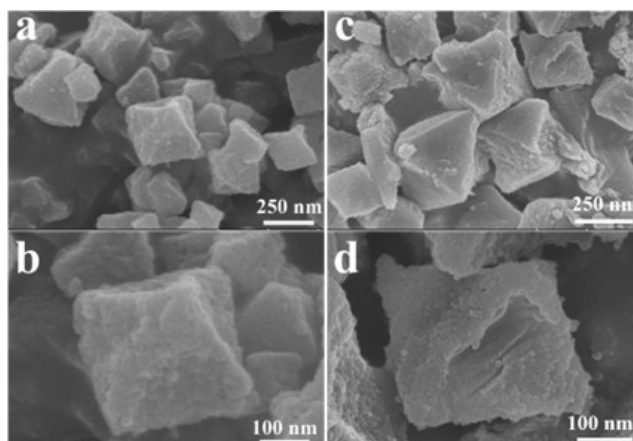

**Fig. S7** SEM images of Fe<sub>3</sub>O<sub>4</sub>/VAN@MIL-101(Fe) recovered after 5 cycles: (a,b) after photocatalytic OER; (c,d) after photocatalytic HER.

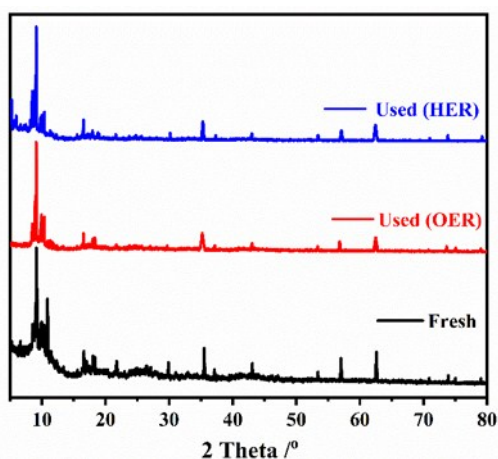

**Fig. S8** Comparison of XRD of fresh Fe<sub>3</sub>O<sub>4</sub>/VAN@MIL-101(Fe) with recycled Fe<sub>3</sub>O<sub>4</sub>/VAN@MIL-101(Fe) in OER and HER after 5 cycles.

## References

1. L. Chi, Q. Xu, X. Liang, J. Wang and X. Su, *Small* (Weinheim an der Bergstrasse, Germany), 2016, **12**.
2. Y. Zhang, X. Zhou, F. Zhang, T. Tian, Y. Ding and H. Gao, *J. Catal.*, 2017, **352**, 246-255.
3. Q. Han, Y. Dong, C. Xu, Q. Hu, C. Dong, X. Liang and Y. Ding, *ACS Appl. Mater. Inter.*, 2020, **12**, 10410-10419.
4. X. Hong, J. Tan, H. Zhu, N. Feng, Y. Yang, J. T. S. Irvine, L. Wang, G. Liu and H.-M. Cheng, *Chem–Eur. J.*, 2019, **25**, 1787-1794.
5. Y. Hu, A. Etogo, R. Liu, J. Ren, L. Qi, C. Zheng, J. Ning and Y. Zhong, *J. Mater. Chem. A*, 2016, **4**.
6. H. J. Kong, D. H. Won, J. Kim and S. Woo, *Chem. Mater.*, 2016, **28**.
7. G. Ge, M. Liu, C. Liu, W. Zhou, D. Wang, L. Liu and J. Ye, *J. Mater. Chem. A*, 2019, **7**, 9222-9229.
8. H. Gong, Y. Zhang, Y. Cao, M. Luo, Z. Feng, W. Yang, K. Liu, H. Cao and H. Yan, *Appl. Catal. B-Environ.*, 2018, **237**.
9. D. Wang, J. Guo, D. Hu, Q. Xu, L. Zhang and J. Wang, *ACS Sustain. Chem. Eng.*, 2018, **6**, 8300-8307.
10. B. Sun, Y. Qian, Z. Liang, Y. Guo, Y. Xue, J. Tian and H. Cui, *Sol. Energ. Mat. Sol. C.*, 2019, **195**, 309-317.
11. R. Bibi, H. Huang, M. Kalulu, Q. Shen, L. Wei, O. Oderinde, N. Li and J. Zhou, *ACS Sustain. Chem. Eng.*, 2018, **6**, 8856–8867.
12. R. Ren, H. Zhao, X. Sui, X. Guo, X. Huang, Y. Wang, Q. Dong and J. Chen, *Catalysts*, 2019, **9**, 89-98.
13. Y. Wang, L. Liu, D. Wu, J. Guo, J. Shi, J. Liu and C. Su, *Chin. J. Catal.*, 2019, **40**, 1198-1204.
14. J. Chen, S. Shen, P. Guo, M. Wang, P. Wu, X. Wang and L. Guo, *Appl. Catal. B-Environ.*, 2014, **152-153**, 335-341.
15. L. Lu, X. Xu, J. Yan, F. N. Shi and Y. Huo, *Dalton T.*, 2018, **47**, 2031-2038.
16. O. Rosseler, M. V. Shankar, M. K.-L. Du, L. Schmidlin, N. Keller and V. Keller, *J. Catal.*, 2010, **269**, 179-190.
17. D. Hwang, H. Kim, J. S. Lee, J. Kim, W. Li and S. Oh, *J. Phys. Chem. B*, 2005, **109**, 2093-2102.
18. Y. Yang, D. Zhang and Q. Xiang, *Nanoscale*, 2019, **11**.
19. J. Chu, X. Han, Z. Yu, Y. Du and P. Xu, *ACS Appl. Mater. Inter.*, 2018, **10**.
20. D. Saadetnejad and R. Yildirim, *Int. J. Hydrogen Energ.*, 2018, **43**, 1116-1122.
